# Supplementary material
Source: PubMed Central journal article supplement (PMC2851750)
Supplement: 0912007107_pnas.0912007107_SI.pdf [file 0912007107_pnas.0912007107_SI.pdf]

# Supporting Information

Bunner et al. 10.1073/pnas.0912007107

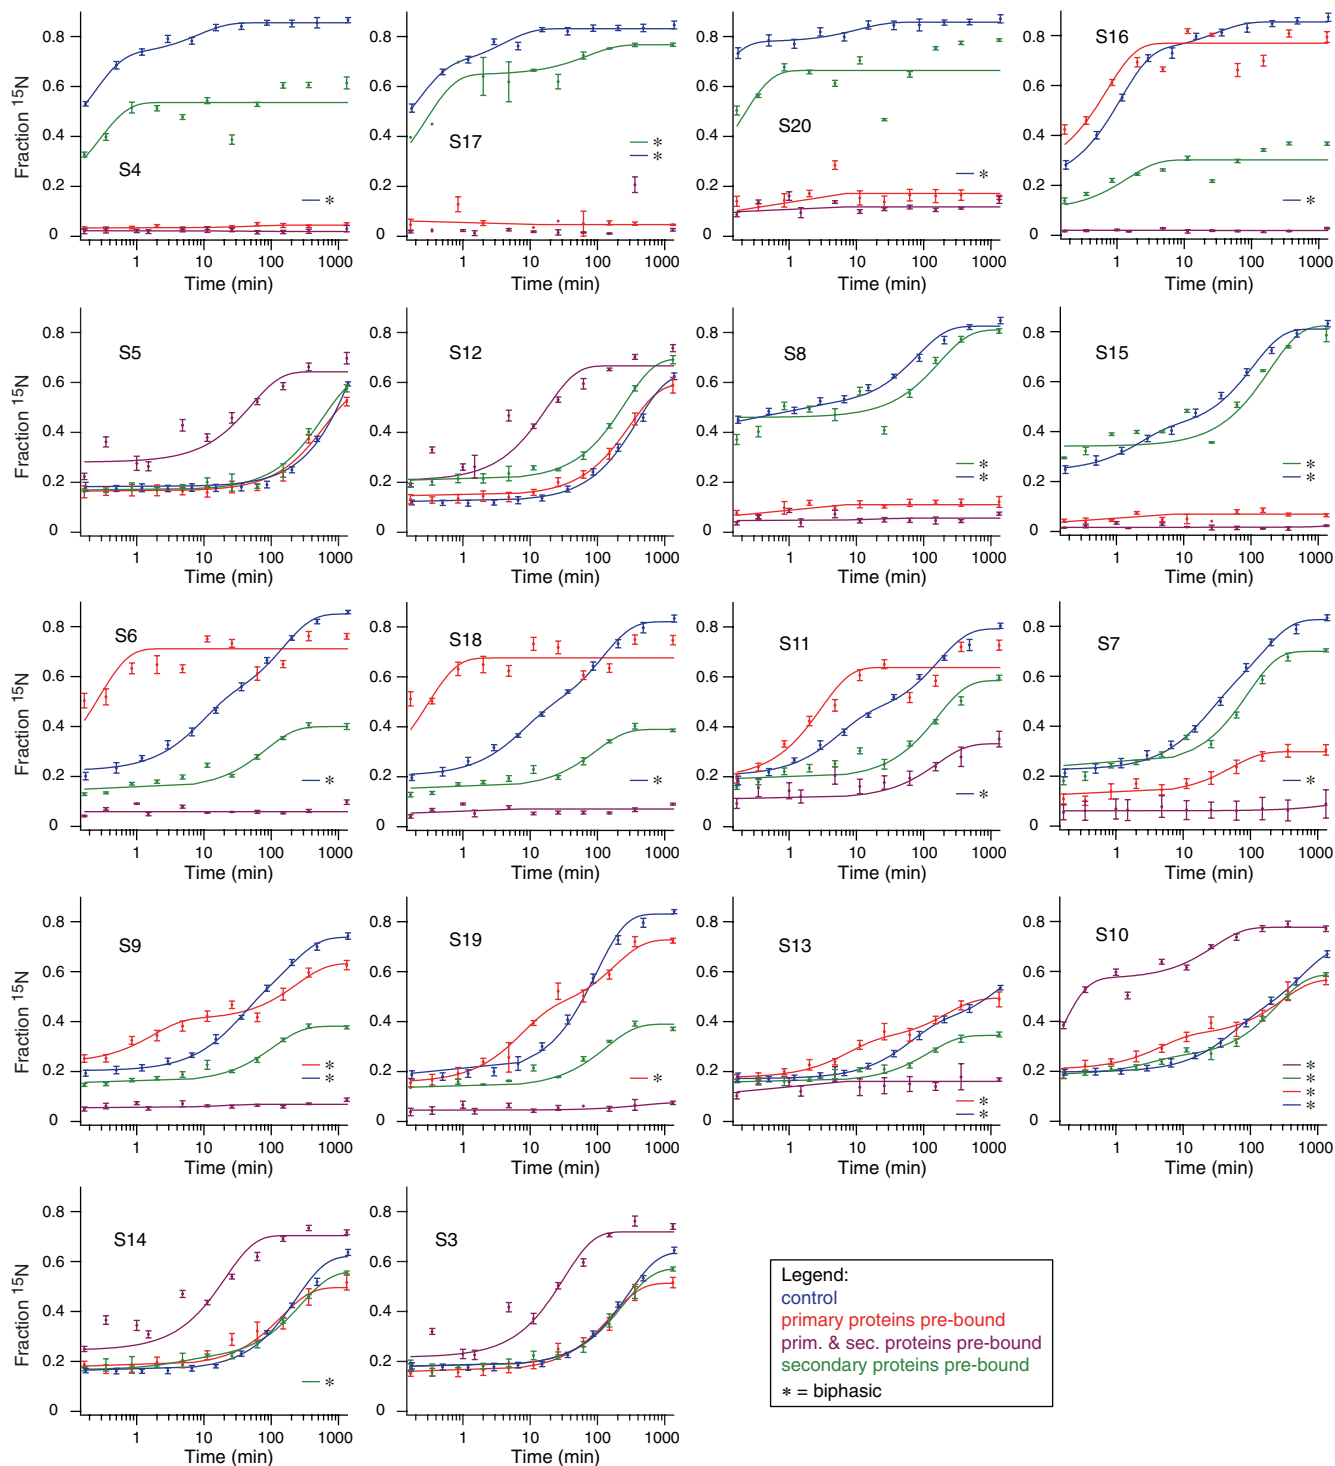

**Fig. S1.** Protein binding progress curves from experiments prebinding only the primary proteins (Red), only the secondary proteins (Green), both the primary and secondary proteins (Purple), and a control experiment (Blue). For these experiments, S11 was included among the secondary proteins. All curves are single exponential fits except those marked with an asterisk, which are double exponential.



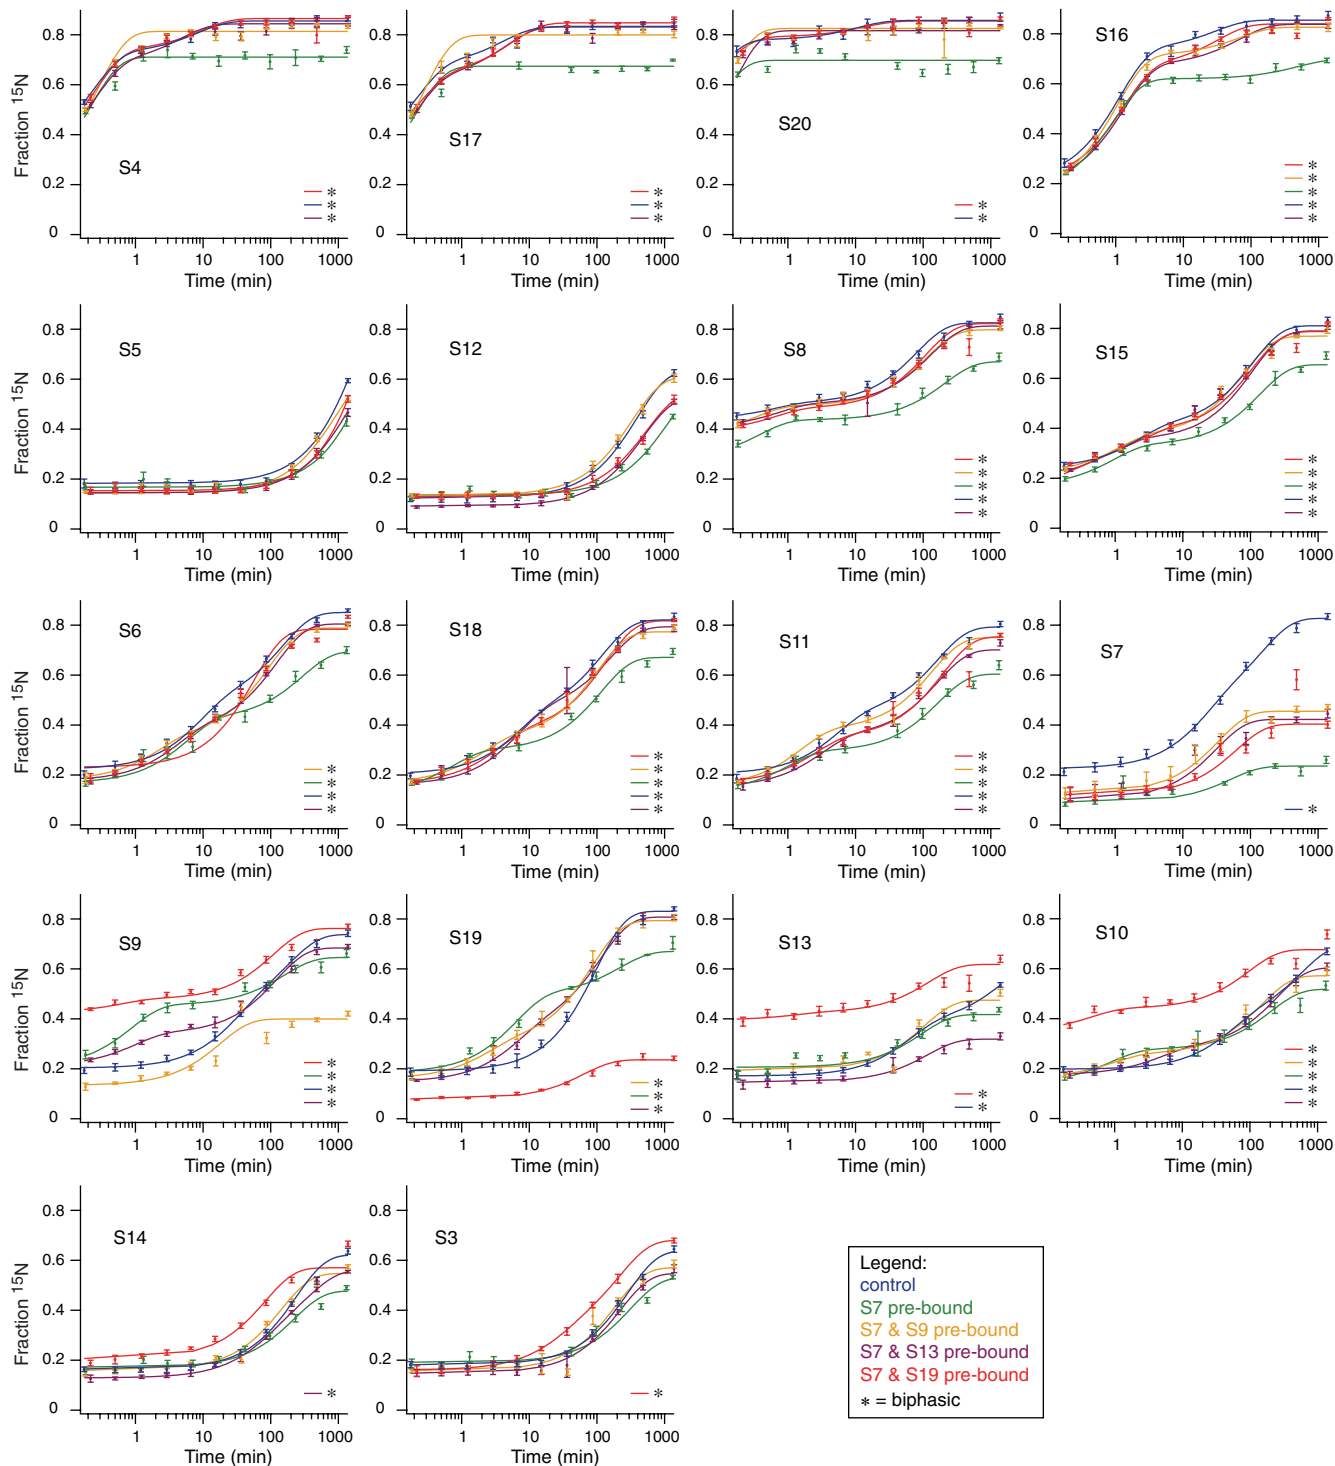

**Fig. S3.** Protein binding progress curves from experiments prebinding S7 alone (*Green*), S7 and S13 (*Purple*), S7 and S19 (*Red*), S7 and S9 (*Orange*), and a control experiment (*Blue*). The binding rates of 5' and central domain proteins are not affected by the prebinding of 3' domain proteins. All curves are single exponential fits except those marked with an asterisk, which are double exponential.



**Table S1. Protein binding rates from control experiments**

| Protein | First order kinetics                           |                                                | Biphasic kinetics—Control expt. 1 |                                  |       |                                  | F-test value |
|---------|------------------------------------------------|------------------------------------------------|-----------------------------------|----------------------------------|-------|----------------------------------|--------------|
|         | Control expt. 1 $k_{obs}$ (min <sup>-1</sup> ) | Control expt. 2 $k_{obs}$ (min <sup>-1</sup> ) | $A_1$                             | $k_{obs,1}$ (min <sup>-1</sup> ) | $A_2$ | $k_{obs,2}$ (min <sup>-1</sup> ) |              |
| S3      | 0.007 ± 0.001                                  | 0.0035 ± 3.E-04                                |                                   |                                  |       |                                  | 0.9          |
| S4      | [2.30 ± 0.07]                                  | 3.9 ± 0.2                                      | 0.1                               | 0.1                              | 0.54  | 5.7                              | 11           |
| S5      | 9.E-04 ± 6.E+04                                | 5.E-04 ± 2.E-04                                |                                   |                                  |       |                                  | 0.7          |
| S6      | [0.030 ± 0.002]                                | 0.019 ± 0.001                                  | 0.36                              | 7E-03                            | 0.28  | 0.1                              | 6.9          |
| S7      | [0.021 ± 0.003]                                | 0.017 ± 0.001                                  | 0.4                               | 6E-03                            | 0.3   | 0.06                             | 4.4          |
| S8      | [0.042 ± 0.002]                                | 0.46 ± 0.04                                    | 0.32                              | 0.012                            | 0.33  | 10                               | 39           |
| S9      | [0.018 ± 0.002]                                | 0.014 ± 0.001                                  | 0.3                               | 5E-03                            | 0.2   | 0.04                             | 6.2          |
| S10     | [0.014 ± 0.002]                                | 0.0054 ± 5.E-04                                | 0.3                               | 2E-03                            | 0.2   | 0.02                             | 21           |
| S11     | [0.032 ± 0.003]                                | 0.028 ± 0.001                                  | 0.35                              | 6.0E-03                          | 0.25  | 0.2                              | 7.9          |
| S12     | 0.003 ± 0.001                                  | 0.0026 ± 2.E-04                                |                                   |                                  |       |                                  | 1.3          |
| S13     | [0.014 ± 0.003]                                | 0.0062 ± 6.E-04                                | 0.2                               | 7E-04                            | 0.2   | 0.02                             | 53           |
| S14     | 0.008 ± 0.001                                  | 0.0043 ± 3.E-04                                |                                   |                                  |       |                                  | 1.3          |
| S15     | [0.035 ± 0.003]                                | 0.023 ± 0.002                                  | 0.41                              | 9.3E-03                          | 0.22  | 0.8                              | 6.3          |
| S16     | [0.81 ± 0.03]                                  | 0.64 ± 0.04                                    | 0.1                               | 0.03                             | 0.54  | 0.92                             | 5.4          |
| S17     | [3.9 ± 0.4]                                    | 2.8 ± 0.2                                      | 0.2                               | 0.3                              | 0.49  | 6                                | 5.2          |
| S18     | [0.025 ± 0.003]                                | 0.029 ± 0.001                                  | 0.38                              | 8E-03                            | 0.25  | 0.2                              | 10           |
| S19     | 0.0188 ± 7.E-04                                | 0.0105 ± 6.E-04                                |                                   |                                  |       |                                  | 2.5          |
| S20     | [5.5 ± 0.2]                                    | 10 ± 1                                         | 0.08                              | 0.09                             | 0.58  | 10                               | 5.7          |

Bracketed rates indicate multiphasic kinetics as determined by F-tests. Biphasic rates and phase amplitudes are given for biphasic datasets from control expt. 1. Amplitudes given are unitless fraction <sup>15</sup>N values. No F-test was performed on the data from control expt. 2.

**Table S2. Protein binding rates from primary protein prebinding experiment**

| Protein | First order kinetics           |       | Biphasic kinetics                |       |                                  | F-test value |
|---------|--------------------------------|-------|----------------------------------|-------|----------------------------------|--------------|
|         | $k_{obs}$ (min <sup>-1</sup> ) | $A_1$ | $k_{obs,1}$ (min <sup>-1</sup> ) | $A_2$ | $k_{obs,2}$ (min <sup>-1</sup> ) |              |
| S3      | 0.006 ± 0.001                  |       |                                  |       |                                  | 1.4          |
| S5      | 0.0016 ± 3.E-04                |       |                                  |       |                                  | 0.8          |
| S6      | 3.6 ± 0.4                      |       |                                  |       |                                  | 1.1          |
| S9      | [0.022 ± 0.003]                | 0.23  | 4.1E-03                          | 0.18  | 0.67                             | 4.2          |
| S10     | [0.045 ± 0.008]                | 0.2   | 3E-03                            | 0.1   | 0.3                              | 5.3          |
| S11     | 0.32 ± 0.04                    |       |                                  |       |                                  | 0.9          |
| S12     | 0.0035 ± 6.E-04                |       |                                  |       |                                  | 0.8          |
| S13     | [0.06 ± 0.01]                  | 0.2   | 5E-03                            | 0.1   | 0.1                              | 5.5          |
| S14     | 0.007 ± 0.002                  |       |                                  |       |                                  | 2.1          |
| S16     | 1.4 ± 0.1                      |       |                                  |       |                                  | 1.7          |
| S18     | 3.3 ± 0.2                      |       |                                  |       |                                  | 1.0          |
| S19     | [0.047 ± 0.003]                | 0.3   | 6E-03                            | 0.3   | 0.1                              | 7.5          |

Bracketed rates indicate multiphasic kinetics as determined by F-tests. Biphasic rates and phase amplitudes are given for biphasic datasets. Amplitudes given are unitless fraction <sup>15</sup>N values.

**Table S3. Protein binding rates from primary and secondary protein prebinding experiment**

| Protein | First order kinetics           |       | Biphasic kinetics                |       |                                  | F-test value |
|---------|--------------------------------|-------|----------------------------------|-------|----------------------------------|--------------|
|         | $k_{obs}$ (min <sup>-1</sup> ) | $A_1$ | $k_{obs,1}$ (min <sup>-1</sup> ) | $A_2$ | $k_{obs,2}$ (min <sup>-1</sup> ) |              |
| S3      | 0.031 ± 0.002                  |       |                                  |       |                                  | 1.3          |
| S5      | 0.020 ± 0.002                  |       |                                  |       |                                  | 1.3          |
| S10     | [0.96 ± 0.08]                  | 0.21  | 0.03                             | 0.43  | 5.6                              | 5.8          |
| S12     | 0.052 ± 0.003                  |       |                                  |       |                                  | 1.5          |
| S14     | 0.048 ± 0.002                  |       |                                  |       |                                  | 3.3          |

Bracketed rates indicate multiphasic kinetics as determined by F-tests. Biphasic rates and phase amplitudes are given for biphasic datasets. Amplitudes given are unitless fraction <sup>15</sup>N values.

**Table S4. Protein binding rates from secondary protein prebinding experiment**

| Protein | First order kinetics           |       | Biphasic kinetics                |       |                                  | F-test value |
|---------|--------------------------------|-------|----------------------------------|-------|----------------------------------|--------------|
|         | $k_{obs}$ (min <sup>-1</sup> ) | $A_1$ | $k_{obs,1}$ (min <sup>-1</sup> ) | $A_2$ | $k_{obs,2}$ (min <sup>-1</sup> ) |              |
| S3      | 0.0041 ± 5.E-04                |       |                                  |       |                                  | 0.8          |
| S4      | 3.6 ± 0.3                      |       |                                  |       |                                  | 2.0          |
| S5      | 0.0017 ± 2.E-04                |       |                                  |       |                                  | 0.6          |
| S7      | 0.0108 ± 7.E-04                |       |                                  |       |                                  | 3.4          |
| S8      | [0.0084 ± 7.E-04]              | 0.33  | 5.7E-03                          | 0.31  | 6                                | 4.6          |
| S10     | [0.0068 ± 4.E-04]              | 0.33  | 3.9E-03                          | 0.10  | 0.8                              | 10           |
| S12     | 0.0038 ± 3.E-04                |       |                                  |       |                                  | 0.8          |
| S14     | [0.0041 ± 3.E-04]              | 0.35  | 3.6E-03                          | 0.05  | 0.3                              | 4.9          |
| S15     | [0.0129 ± 4.E-04]              | 0.46  | 5.0E-03                          | 0.22  | 6.7                              | 5.1          |
| S17     | [2.2 ± 0.4]                    | 0.12  | 0.01                             | 0.44  | 3                                | 58           |
| S20     | 5 ± 0.2                        |       |                                  |       |                                  | 2.0          |

Bracketed rates indicate multiphasic kinetics as determined by F-tests. Biphasic rates and phase amplitudes are given for biphasic datasets. Amplitudes given are unitless fraction <sup>15</sup>N values.

**Table S5. Protein binding rates from 5' and central domain proteins prebinding experiment**

| Protein | $k_{obs}$ (min <sup>-1</sup> ) | F-test value |
|---------|--------------------------------|--------------|
| S3      | 0.024 ± 0.003                  | 1.4          |
| S7      | 0.064 ± 0.004                  | 2.9          |
| S9      | 0.031 ± 0.004                  | 0.9          |
| S10     | 0.038 ± 0.004                  | 2.0          |
| S13     | 0.021 ± 0.004                  | 1.2          |
| S14     | 0.024 ± 0.004                  | 1.0          |
| S19     | 0.014 ± 0.002                  | 1.1          |

First order rates are given. None of these datasets are biphasic according to the F-tests.

**Table S6. Protein binding rates from 5' and central domain proteins plus S7 prebinding experiment**

| Protein | First order kinetics           |       | Biphasic kinetics                |       |                                  | F-test value |
|---------|--------------------------------|-------|----------------------------------|-------|----------------------------------|--------------|
|         | $k_{obs}$ (min <sup>-1</sup> ) | $A_1$ | $k_{obs,1}$ (min <sup>-1</sup> ) | $A_2$ | $k_{obs,2}$ (min <sup>-1</sup> ) |              |
| S3      | [0.02 ± 0.002]                 | 0.2   | 2E-03                            | 0.24  | 0.04                             | 6.3          |
| S9      | [0.12 ± 0.01]                  | 0.29  | 0.03                             | 0.11  | 6                                | 5.7          |
| S10     | [0.023 ± 0.002]                | 0.22  | 4E-03                            | 0.15  | 0.2                              | 4.2          |
| S13     | [0.015 ± 0.002]                | 0.1   | 3E-03                            | 0.1   | 0.09                             | 12           |
| S14     | [0.013 ± 0.001]                | 0.2   | 2E-03                            | 0.2   | 0.05                             | 22           |
| S19     | 0.036 ± 0.003                  |       |                                  |       |                                  | 1.9          |

Bracketed rates indicate multiphasic kinetics as determined by F-tests. Biphasic rates and phase amplitudes are given for biphasic datasets. Amplitudes given are unitless fraction <sup>15</sup>N values.

**Table S7. Protein binding rates from S7 prebinding experiment**

| Protein | First order kinetics           |       | Biphasic kinetics                |       |                                  | F-test value |
|---------|--------------------------------|-------|----------------------------------|-------|----------------------------------|--------------|
|         | $k_{obs}$ (min <sup>-1</sup> ) | $A_1$ | $k_{obs,1}$ (min <sup>-1</sup> ) | $A_2$ | $k_{obs,2}$ (min <sup>-1</sup> ) |              |
| S3      | 0.0032 ± 4.E-04                |       |                                  |       |                                  | 2.7          |
| S4      | 4.7 ± 0.3                      |       |                                  |       |                                  | N/D          |
| S5      | 3.E-04 ± 3.E-04                |       |                                  |       |                                  | 0.5          |
| S6      | [0.045 ± 0.003]                | 0.27  | 3E-03                            | 0.26  | 0.2                              | 6.8          |
| S8      | [0.43 ± 0.02]                  | 0.23  | 5E-03                            | 0.27  | 5                                | 23           |
| S9      | [0.47 ± 0.05]                  | 0.19  | 6E-03                            | 0.28  | 1                                | 10           |
| S10     | [0.063 ± 0.008]                | 0.24  | 5E-03                            | 0.11  | 0.8                              | 7.5          |
| S11     | [0.011 ± 0.002]                | 0.31  | 6E-03                            | 0.14  | 0.8                              | 7.3          |
| S12     | 0.0010 ± 2.E-04                |       |                                  |       |                                  | 0.8          |
| S13     | 0.011 ± 0.001                  |       |                                  |       |                                  | 4.0          |
| S14     | 0.0045 ± 5.E-04                |       |                                  |       |                                  | 2.5          |
| S15     | [0.015 ± 0.001]                | 0.32  | 7E-03                            | 0.18  | 1                                | 13           |
| S16     | [0.94 ± 0.04]                  | 0.08  | 2E-03                            | 0.45  | 1.0                              | 7.2          |
| S17     | 4.7 ± 0.3                      |       |                                  |       |                                  | N/D          |
| S18     | [0.0122 ± 9.E-04]              | 0.37  | 8.6E-03                          | 0.14  | 1                                | 5.1          |
| S19     | [0.030 ± 0.001]                | 0.18  | 5E-03                            | 0.31  | 0.2                              | 5.9          |
| S20     | 12.3 ± 0.9                     |       |                                  |       |                                  | N/D          |

Bracketed rates indicate multiphasic kinetics as determined by F-tests. Biphasic rates and phase amplitudes are given for biphasic datasets. Amplitudes given are unitless fraction <sup>15</sup>N values. F-test values could not be determined for S4, S17, and S20.

**Table S8. Protein binding rates from S7 and S13 prebinding experiment**

| Protein | First order kinetics           |       | Biphasic kinetics                |       |                                  | F-test value |
|---------|--------------------------------|-------|----------------------------------|-------|----------------------------------|--------------|
|         | $k_{obs}$ (min <sup>-1</sup> ) | $A_1$ | $k_{obs,1}$ (min <sup>-1</sup> ) | $A_2$ | $k_{obs,2}$ (min <sup>-1</sup> ) |              |
| S3      | 0.0045 ± 4.E-04                |       |                                  |       |                                  | 1.9          |
| S4      | [2.8 ± 0.1]                    | 0.2   | 0.2                              | 0.53  | 5.1                              | 4.7          |
| S5      | 0.0007 ± 2.E-04                |       |                                  |       |                                  | 0.4          |
| S6      | [0.0169 ± 6.E-04]              | 0.43  | 8.2E-03                          | 0.22  | 0.3                              | 21           |
| S8      | [0.178 ± 0.009]                | 0.31  | 7.7E-03                          | 0.35  | 7.2                              | 53           |
| S9      | [0.082 ± 0.004]                | 0.34  | 8.2E-03                          | 0.19  | 2                                | 17           |
| S10     | [0.009 ± 0.001]                | 0.33  | 4E-03                            | 0.1   | 0.2                              | 11           |
| S11     | [0.0128 ± 8.E-04]              | 0.35  | 6.0E-03                          | 0.21  | 0.3                              | 14           |
| S12     | 0.0021 ± 1.E-04                |       |                                  |       |                                  | 1.5          |
| S14     | [0.0049 ± 2.E-04]              | 0.3   | 3E-03                            | 0.2   | 0.01                             | 5.4          |
| S15     | [0.0142 ± 6.E-04]              | 0.44  | 9.3E-03                          | 0.21  | 2.2                              | 11           |
| S16     | [0.54 ± 0.02]                  | 0.17  | 0.01                             | 0.52  | 0.86                             | 9.8          |
| S17     | [2.7 ± 0.1]                    | 0.21  | 0.2                              | 0.47  | 5.8                              | 5.5          |
| S18     | [0.0143 ± 5.E-04]              | 0.34  | 6E-03                            | 0.29  | 0.2                              | 15           |
| S19     | [0.0210 ± 8.E-04]              | 0.45  | 9E-03                            | 0.2   | 0.2                              | 11           |
| S20     | 7.1 ± 0.4                      |       |                                  |       |                                  | N/D          |

Bracketed rates indicate multiphasic kinetics as determined by F-tests. Biphasic rates and phase amplitudes are given for biphasic datasets. Amplitudes given are unitless fraction <sup>15</sup>N values. An F-test value could not be determined for S20.

**Table S9. Protein binding rates from S7 and S9 prebinding experiment**

| Protein | First order kinetics           |       | Biphasic kinetics                |       |                                  | F-test value |
|---------|--------------------------------|-------|----------------------------------|-------|----------------------------------|--------------|
|         | $k_{obs}$ (min <sup>-1</sup> ) | $A_1$ | $k_{obs,1}$ (min <sup>-1</sup> ) | $A_2$ | $k_{obs,2}$ (min <sup>-1</sup> ) |              |
| S3      | 0.0052 ± 4.E-04                |       |                                  |       |                                  | 0.8          |
| S4      | 3.7 ± 0.1                      |       |                                  |       |                                  | 3.1          |
| S5      | 0.0011 ± 2.E-04                |       |                                  |       |                                  | 0.6          |
| S6      | [0.0217 ± 9.E-04]              | 0.44  | 0.011                            | 0.19  | 0.6                              | 16           |
| S8      | [0.61 ± 0.03]                  | 0.31  | 9E-03                            | 0.34  | 8                                | 81           |
| S10     | [0.013 ± 0.001]                | 0.32  | 7E-03                            | 0.10  | 1                                | 11           |
| S11     | [0.016 ± 0.001]                | 0.37  | 7.4E-03                          | 0.22  | 0.64                             | 25           |
| S12     | 0.0031 ± 3.E-04                |       |                                  |       |                                  | 0.8          |
| S13     | 0.0097 ± 9.E-04                |       |                                  |       |                                  | 0.8          |
| S14     | 0.0069 ± 4.E-04                |       |                                  |       |                                  | 1.9          |
| S15     | [0.035 ± 0.002]                | 0.40  | 0.012                            | 0.19  | 1                                | 8.3          |
| S16     | [0.78 ± 0.03]                  | 0.11  | 0.01                             | 0.56  | 0.98                             | 8.4          |
| S17     | 3.8 ± 0.2                      |       |                                  |       |                                  | 6.0          |
| S18     | [0.017 ± 0.001]                | 0.43  | 9.8E-03                          | 0.18  | 0.5                              | 13           |
| S19     | [0.0196 ± 9.E-04]              | 0.49  | 0.01                             | 0.2   | 0.5                              | 18           |
| S20     | 8.9 ± 0.5                      |       |                                  |       |                                  | 3.6          |

Bracketed rates indicate multiphasic kinetics as determined by F-tests. Biphasic rates and phase amplitudes are given for biphasic datasets. Amplitudes given are unitless fraction <sup>15</sup>N values.

**Table S10. Protein binding rates from S7 and S19 prebinding experiment**

| Protein | First order kinetics           |       | Biphasic kinetics                |       |                                  | F-test value |
|---------|--------------------------------|-------|----------------------------------|-------|----------------------------------|--------------|
|         | $k_{obs}$ (min <sup>-1</sup> ) | $A_1$ | $k_{obs,1}$ (min <sup>-1</sup> ) | $A_2$ | $k_{obs,2}$ (min <sup>-1</sup> ) |              |
| S3      | [0.0080 ± 5.E-04]              | 0.4   | 4E-03                            | 0.1   | 0.04                             | 13           |
| S4      | [3.1 ± 0.1]                    | 0.13  | 0.1                              | 0.58  | 5.0                              | 8.1          |
| S5      | 0.0003 ± 8E+04                 |       |                                  |       |                                  | 0.1          |
| S6      | 0.0175 ± 7.E-04                |       |                                  |       |                                  | 3.5          |
| S8      | [0.024 ± 0.001]                | 0.34  | 9.1E-03                          | 0.33  | 7.0                              | 26           |
| S9      | [4.9 ± 0.2]                    | 0.28  | 9E-03                            | 0.33  | 9.7                              | 34           |
| S10     | [1.26 ± 0.08]                  | 0.24  | 0.01                             | 0.29  | 7                                | 12           |
| S11     | [0.021 ± 0.001]                | 0.41  | 5.1E-03                          | 0.20  | 0.5                              | 7.8          |
| S12     | 0.0018 ± 2.E-04                |       |                                  |       |                                  | 1.0          |
| S13     | [3.1 ± 0.4]                    | 0.19  | 8E-03                            | 0.27  | 9                                | 10           |
| S14     | 0.0121 ± 8.E-04                |       |                                  |       |                                  | 2.6          |
| S15     | [0.0242 ± 9.E-04]              | 0.40  | 9.4E-03                          | 0.22  | 1.5                              | 4.5          |
| S16     | [0.78 ± 0.03]                  | 0.17  | 0.03                             | 0.50  | 0.88                             | 6.3          |
| S17     | [1.45 ± 0.06]                  | 0.21  | 0.2                              | 0.48  | 6.0                              | 58           |
| S18     | [0.022 ± 0.001]                | 0.45  | 7.4E-03                          | 0.21  | 0.3                              | 11           |
| S20     | [8.7 ± 0.4]                    | 0.07  | 0.07                             | 0.64  | 11                               | 6.4          |

Bracketed rates indicate multiphasic kinetics as determined by F-tests. Biphasic rates and phase amplitudes are given for biphasic datasets. Amplitudes given are unitless fraction <sup>15</sup>N values.
